# Supplementary material for: Racial/Ethnic Differences in Dementia Risk Among Older Type 2 Diabetic Patients: The Diabetes and Aging Study
Source: PubMed Central journal article supplement — Diabetes Care. 2014 Mar 8;37(4):1009–15. doi: 10.2337/dc13-0215 (PMC3964496; doi:10.2337/dc13-0215), 2014-03-08
Supplement: supp_dc13-0215v130215_DC130215SupplementaryData.pdf [file supp_dc13-0215v130215_DC130215SupplementaryData.pdf]

SUPPLEMENTARY DATA

**Supplementary Table 1.** Diagnostic Codes for comorbidities.

| Comorbidity                  | Specific disease or treatment                                                                                              | ICD-9 CM Codes                                                                                                   | CPT Codes                                                                        |
|------------------------------|----------------------------------------------------------------------------------------------------------------------------|------------------------------------------------------------------------------------------------------------------|----------------------------------------------------------------------------------|
| <b>Acute metabolic event</b> | Severe hyperglycemic event requiring hospitalization                                                                       | 250.1x, 250.2x, 249.2x                                                                                           |                                                                                  |
|                              | Severe hypoglycemic event requiring hospitalization                                                                        | 251.0, 251.1, 251.2                                                                                              |                                                                                  |
| <b>Microvascular disease</b> | Diabetic retinal disease                                                                                                   | 250.5x, 362.02, 362.53, 362.83                                                                                   | 67208, 67210, 67228                                                              |
|                              | End-stage renal disease                                                                                                    | Ascertained by matching with the U.S. Renal Data System Registry                                                 |                                                                                  |
|                              | Lower-extremity complications:<br>Gangrene or lower limb ulcer that required hospitalization<br>Lower extremity amputation | 040.0, 250.7x, 440.23, 440.24, 707.1x, 785.4, 892.1<br>84.10-84.17                                               | 27290, 27295, 27598-27882, 27884, 27886, 27888-28800, 28805, 28810, 28820, 28825 |
| <b>Macrovascular disease</b> | Peripheral arterial disease                                                                                                | 440.xx (without 440.23 440.24), 441.xx, 442.0, 442.3, 443.81 (if underlying disease is diabetes mellitus), 443.9 |                                                                                  |
|                              | Myocardial infarction                                                                                                      | 410.xx, 412                                                                                                      |                                                                                  |
|                              | Congestive heart failure                                                                                                   | 401.91, 402.01, 402.11, 402.91, 404.01, 404.03, 404.11, 404.13, 404.93, 425.1x, 428.0, 428.1, 428.9              |                                                                                  |
|                              | Cerebrovascular disease                                                                                                    | 431, 433.xx, 434.xx, 436, 442.81, 442.82                                                                         |                                                                                  |
| <b>Hypertension</b>          |                                                                                                                            | 401.x-405.x                                                                                                      |                                                                                  |

All comorbidities were defined between 1/1/1996-12/31/1997.
